# Supplementary material for: Unravelling Constant pH Molecular Dynamics in Oligopeptides with Explicit Solvation Model
Source: MDPI journal article supplement (doi:10.3390/polym13193311), 2021-09-28
Supplement: s1 [file s1]

# Unravelling Constant pH Molecular Dynamics in Oligopeptides with Explicit Solvation Model

Cristian Privat, Sergio Madurga \*, Francesc Mas and Jaime Rubio-Martinez \*

Department of Material Science and Physical Chemistry & Research Institute of Theoretical and Computational Chemistry (IQTCCUB), University of Barcelona, C/Martí i Franquès 1, 08028 Barcelona, Spain; cprivat@ub.edu (C.P.); fmas@ub.edu (F.M.)

\* Correspondence: s.madurga@ub.edu (S.M.); jaime.rubio@ub.edu (J.R.-M.)

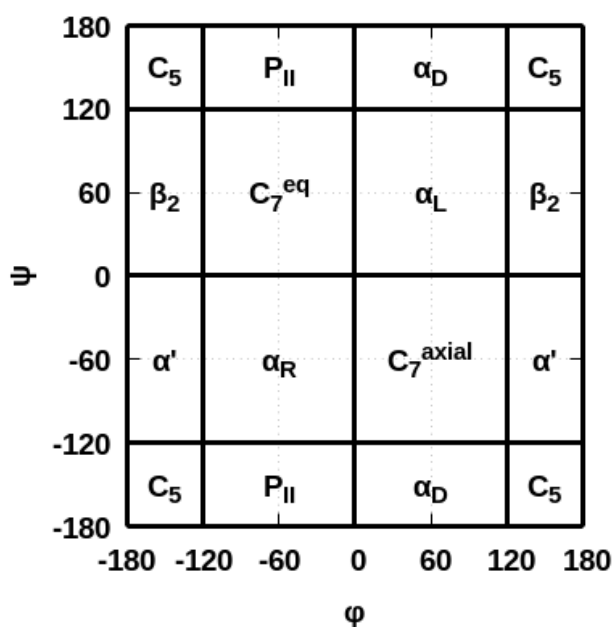

**Figure S1.** Classification of the nine secondary structure regions ( $C_5$ ,  $P_{II}$ ,  $\alpha_D$ ,  $\beta_2$ ,  $C_7^{eq}$ ,  $\alpha_L$ ,  $\alpha'$ ,  $\alpha_R$  and  $C_7^{axial}$ ) in the Ramachandran space by J. Rubio-Martinez et al. [1].

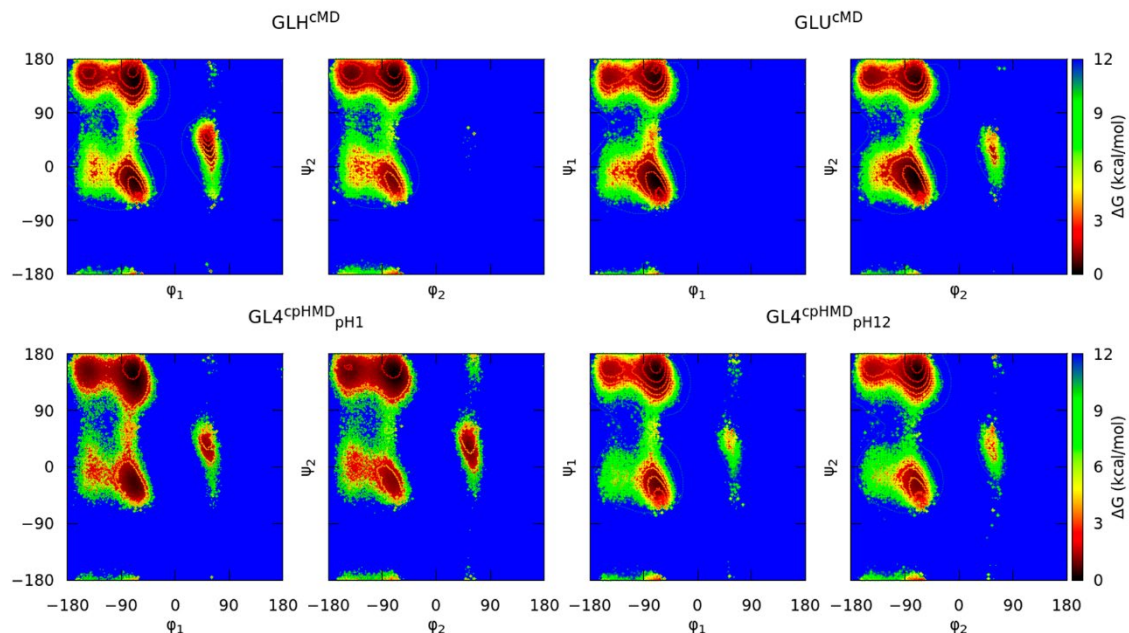

**Figure S2.** Ramachandran maps of the capped Glu<sub>2</sub> tripeptide. Titles indicate the residues, the simulation method in the superscripts and the pH value in the subscripts. Each simulation conditions have two energy maps according to the set of backbone dihedral angles of the N-terminal ( $\phi_1/\psi_1$ ) or the C-terminal amino acid ( $\phi_2/\psi_2$ ). Solid lines indicate an increase of 0.6 kcal/mol in the energy map.

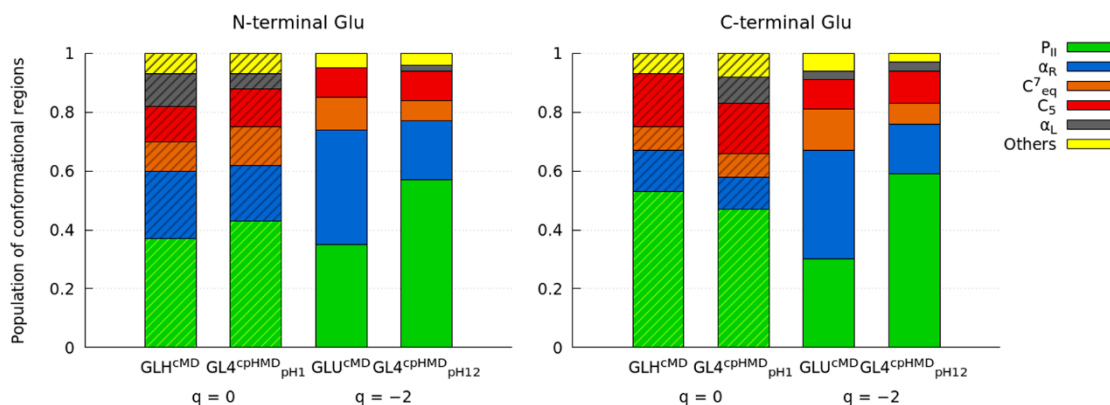

**Figure S3.** Populations of the conformational regions ( $P_{II}$ ,  $\alpha_R$ ,  $C^7_{eq}$ ,  $C_5$  and  $\alpha_L$ ) in the Ramachandran maps of each amino acid of the capped Glu<sub>2</sub> tripeptide. Labels indicate the residues, the simulation method in the superscripts and the pH value in the subscripts. Net charge of the tripeptide is below ( $q$ ). Striped or solid box style are protonated or deprotonated states, respectively.

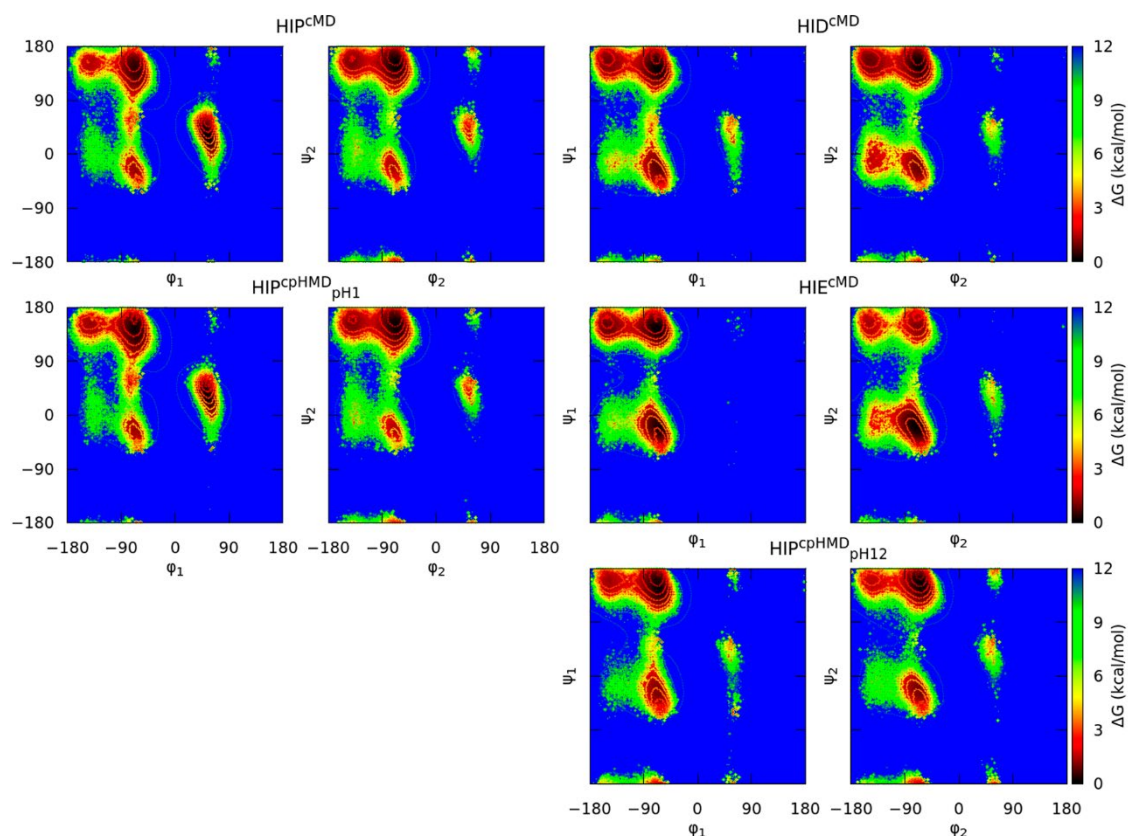

**Figure S4.** Ramachandran maps of the capped His<sub>2</sub> tripeptide. Titles indicate the residues, the simulation method in the superscripts and the pH value in the subscripts. Each simulation conditions have two energy maps according to the set of backbone dihedral angles of the N-terminal ( $\phi_1/\psi_1$ ) or the C-terminal amino acid ( $\phi_2/\psi_2$ ). Solid lines indicate an increase of 0.6 kcal/mol in the energy map.

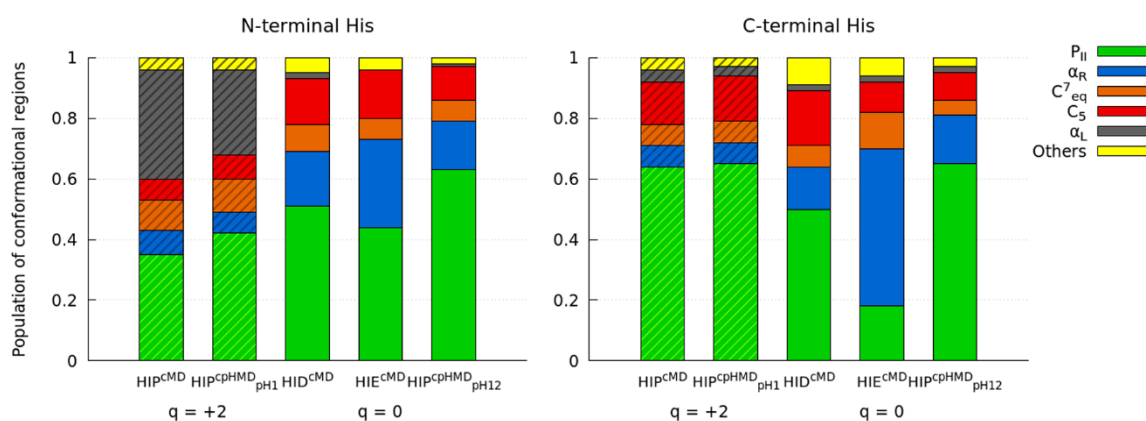

**Figure S5.** Populations of the conformational regions ( $P_{II}$ ,  $\alpha_R$ ,  $C^7_{eq}$ ,  $C_5$  and  $\alpha_L$ ) in the Ramachandran maps of each amino acid of the capped His<sub>2</sub> tripeptide. Labels indicate the residues, the simulation method in the superscripts and the pH value in the subscripts. Net charge of the tripeptide is below (q). Striped or solid box style are protonated or deprotonated states, respectively.

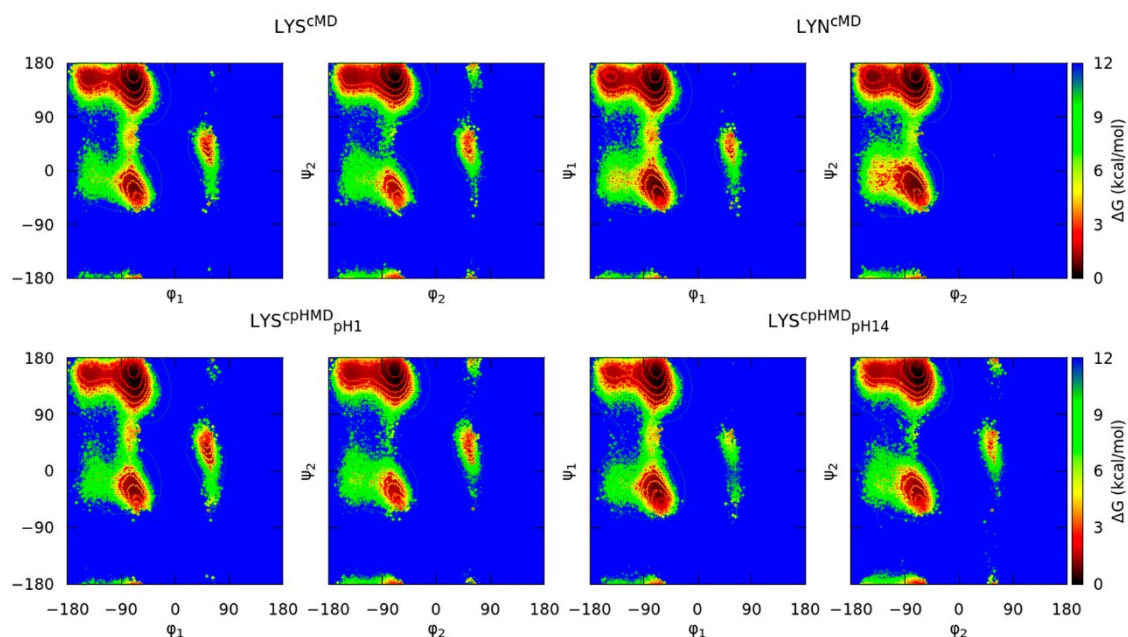

**Figure S6.** Ramachandran maps of the capped Lys<sub>2</sub> tripeptide. Titles indicate the residues, the simulation method in the superscripts and the pH value in the subscripts. Each simulation conditions have two energy maps according to the set of backbone dihedral angles of the N-terminal ( $\phi_1/\psi_1$ ) or the C-terminal amino acid ( $\phi_2/\psi_2$ ). Solid lines indicate an increase of 0.6 kcal/mol in the energy map.

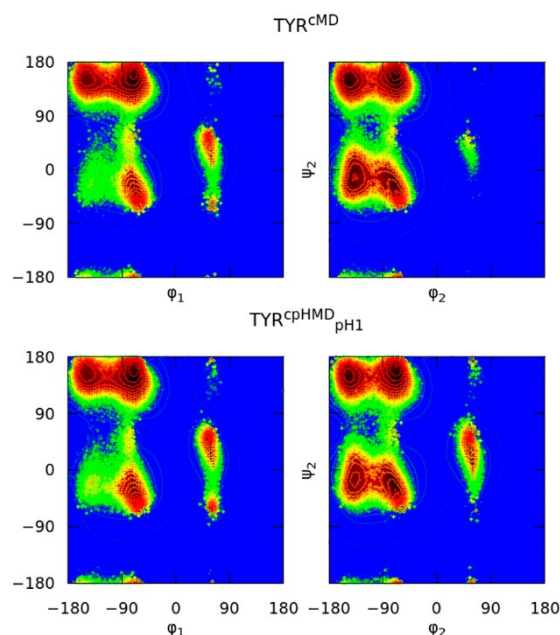

**Figure S7.** Ramachandran maps of the capped Tyr<sub>2</sub> tripeptide. Titles indicate the residues, the simulation method in the superscripts and the pH value in the subscripts. Each simulation conditions have two energy maps according to the set of backbone dihedral angles of the N-terminal ( $\phi_1/\psi_1$ ) or the C-terminal amino acid ( $\phi_2/\psi_2$ ). Solid lines indicate an increase of 0.6 kcal/mol in the energy map.

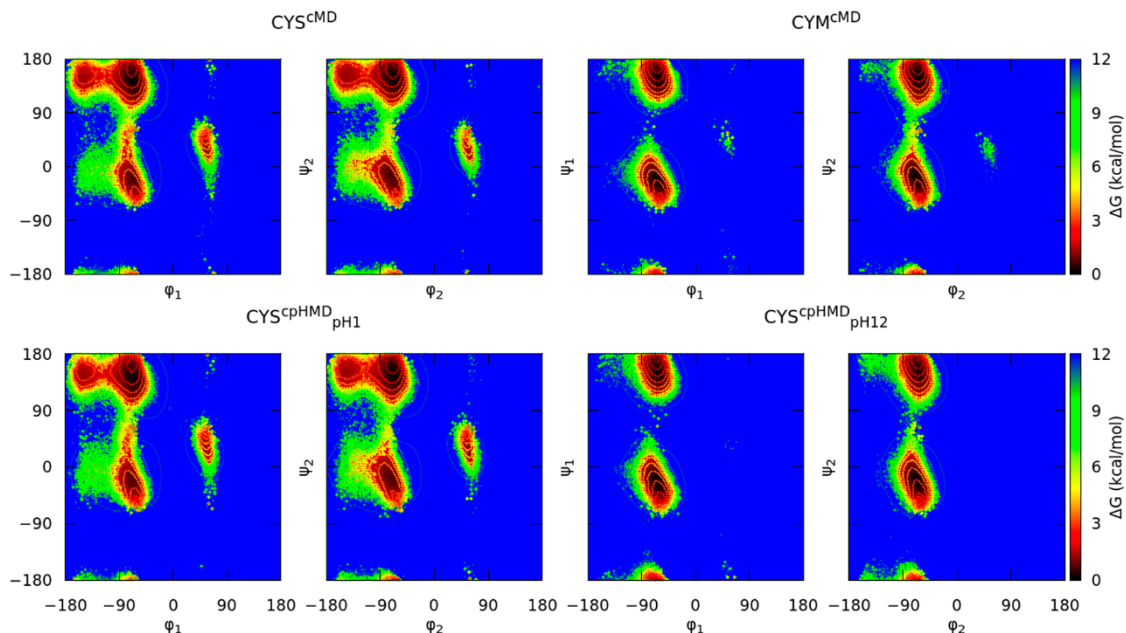

**Figure S8.** Ramachandran maps of the capped Cys<sub>2</sub> tripeptide. Titles indicate the residues, the simulation method in the superscripts and the pH value in the subscripts. Each simulation conditions have two energy maps according to the set of backbone dihedral angles of the N-terminal ( $\phi_1/\psi_1$ ) or the C-terminal amino acid ( $\phi_2/\psi_2$ ). Solid lines indicate an increase of 0.6 kcal/mol in the energy map.

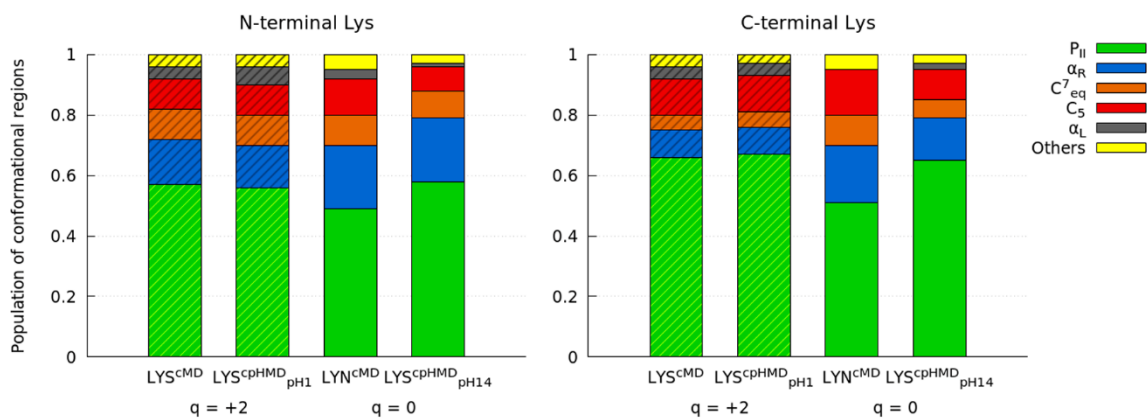

**Figure S9.** Populations of the conformational regions ( $P_{II}$ ,  $\alpha_R$ ,  $C^7_{eq}$ ,  $C_5$  and  $\alpha_L$ ) in the Ramachandran maps of each amino acid of the capped Lys<sub>2</sub> tripeptide. Labels indicate the residues, the simulation method in the superscripts and the pH value in the subscripts. Net charge of the tripeptide is below (q). Striped or solid box style are protonated or deprotonated states, respectively.

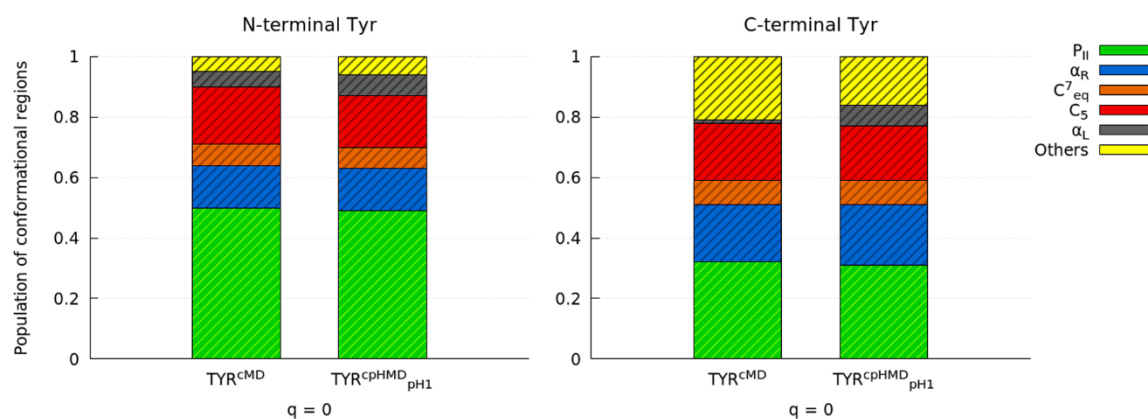

**Figure S10.** Populations of the conformational regions ( $P_{II}$ ,  $\alpha_R$ ,  $C_{eq}^7$ ,  $C_5$  and  $\alpha_L$ ) in the Ramachandran maps of each amino acid of the capped Tyr<sub>2</sub> tripeptide. Labels indicate the residues, the simulation method in the superscripts and the pH value in the subscripts. Net charge of the tripeptide is below (q). Striped or solid box style are protonated or deprotonated states, respectively.

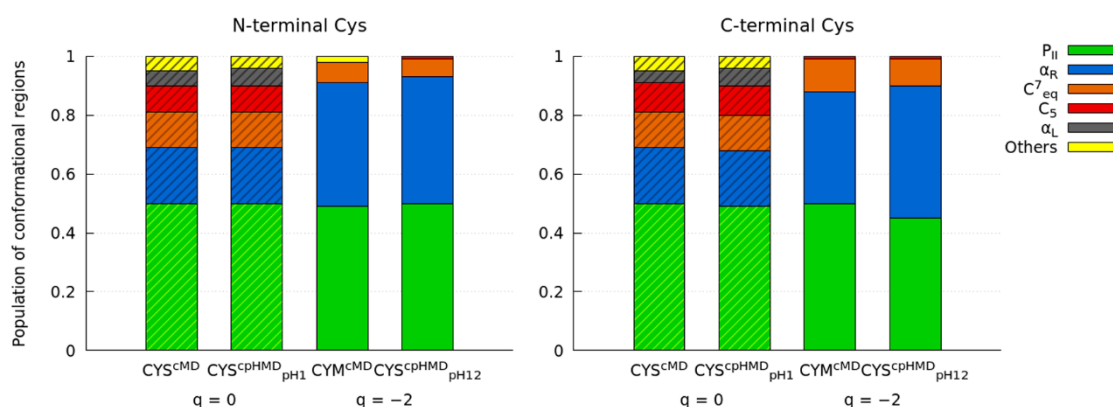

**Figure S11.** Populations of the conformational regions ( $P_{II}$ ,  $\alpha_R$ ,  $C_{eq}^7$ ,  $C_5$  and  $\alpha_L$ ) in the Ramachandran maps of each amino acid of the capped Cys<sub>2</sub> tripeptide. Labels indicate the residues, the simulation method in the superscripts and the pH value in the subscripts. Net charge of the tripeptide is below (q). Striped or solid box style are protonated or deprotonated states, respectively.



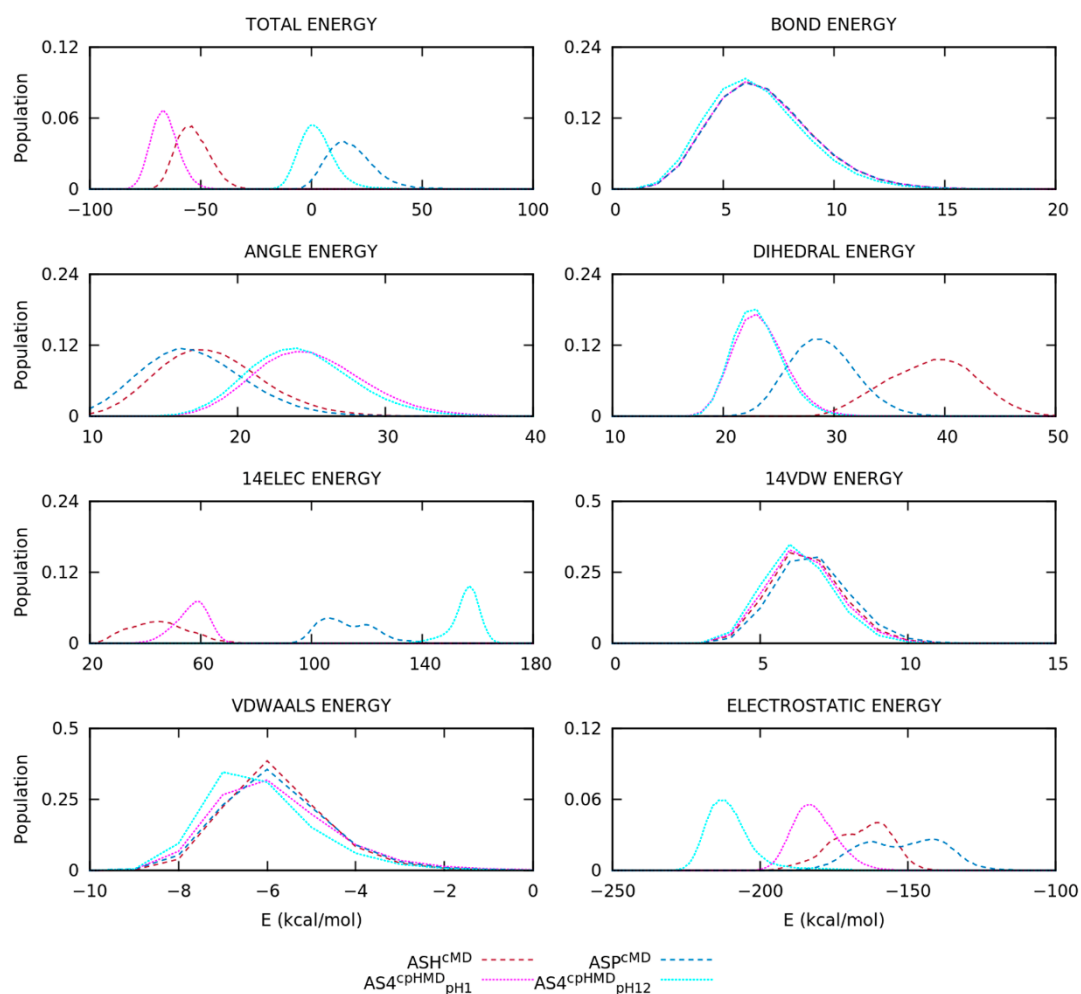

**Figure S12.** Energy distributions of the capped Asp<sub>2</sub> tripeptide without solvent molecules. Dotted and dashed lines are cpHMD and cMD simulations, respectively.

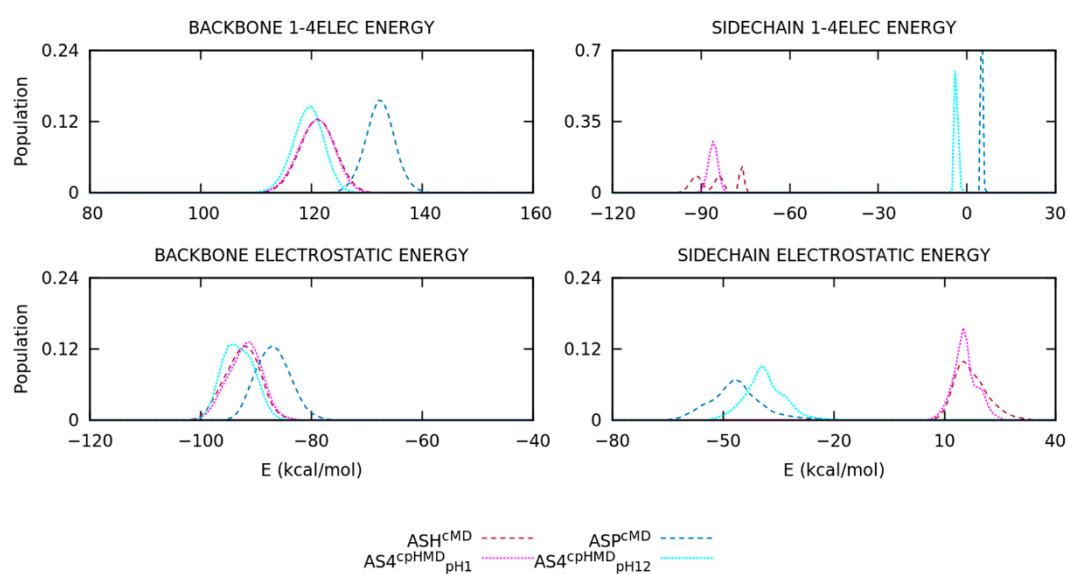

**Figure S13.** Energy distribution of the 1-4 and long-range electrostatics capped Asp2 tripeptide divided in backbone and side chain atoms. Dotted and dashed lines are cpHMD and cMD simulation methods, respectively.

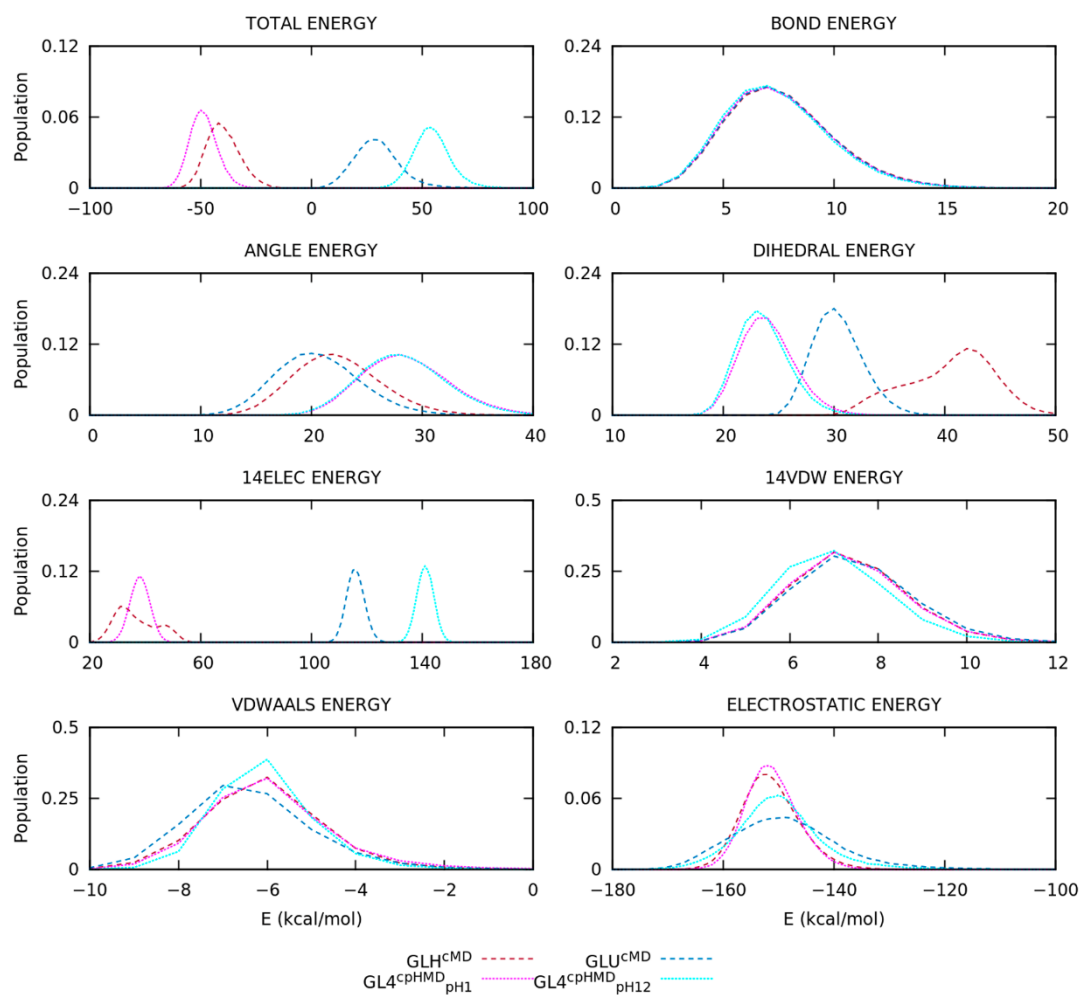

**Figure S14.** Energy distributions of the capped Glu2 tripeptide without solvent molecules. Dotted and dashed lines are cpHMD and cMD simulations, respectively.



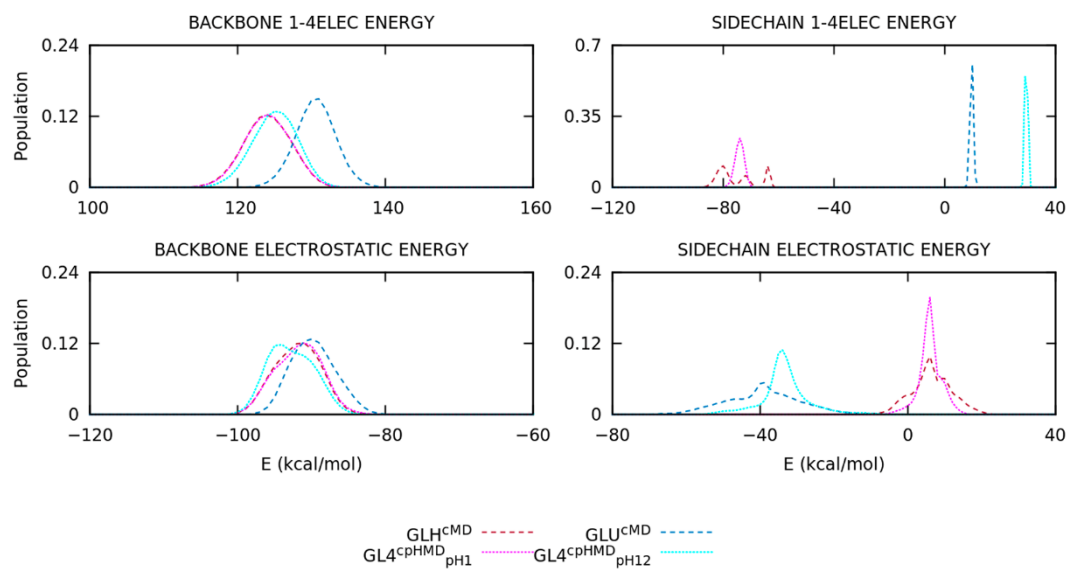

**Figure S15.** Energy distribution of the 1-4 and long-range electrostatics capped Glu<sub>2</sub> tripeptide divided in backbone and side chain atoms. Dotted and dashed lines are cpHMD and cMD simulation methods, respectively.

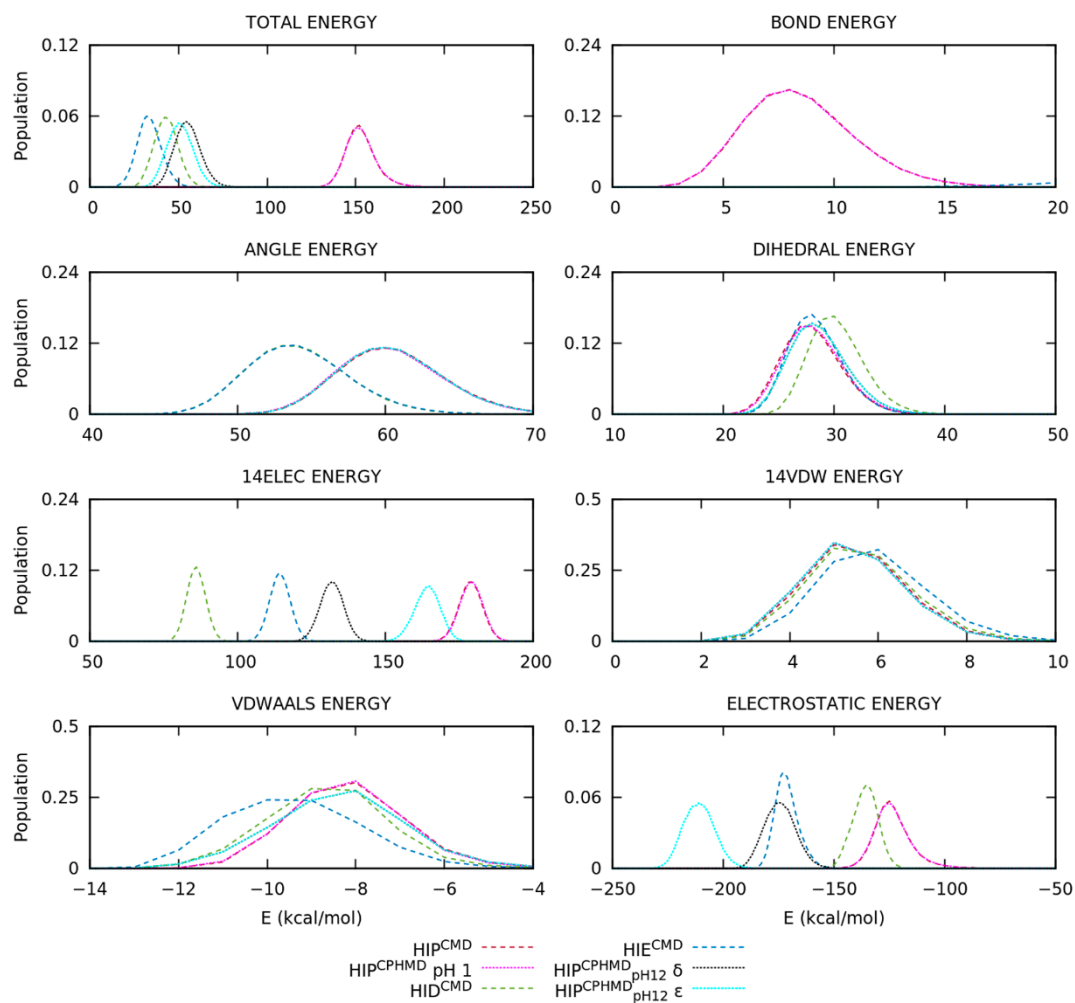

**Figure S16.** Energy distributions of the capped His2 tripeptide without solvent molecules. Dotted and dashed lines are cpHMD and cMD simulations, respectively. “ $\text{HIP}^{\text{cpHMD}}_{\text{pH } 12 \delta}$ ” and “ $\text{HIP}^{\text{cpHMD}}_{\text{pH } 12 \epsilon}$ ” are the energy distributions calculated using partial charges fixed on the  $\delta$  and  $\epsilon$  protonation state.

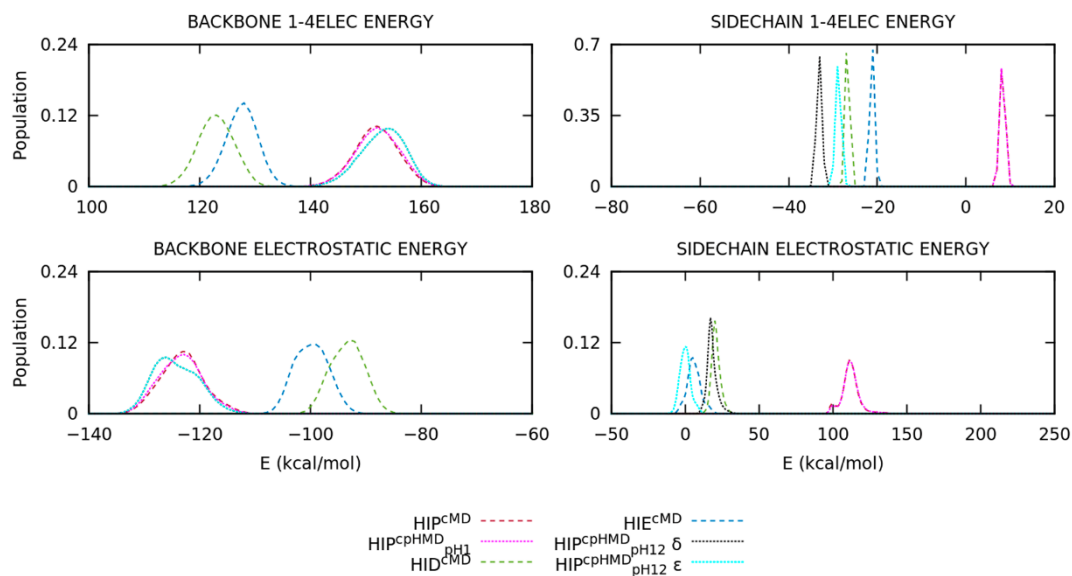

**Figure S17.** Energy distribution of the 1-4 and long-range electrostatics capped His<sub>2</sub> tripeptide divided in backbone and side chain atoms. Dotted and dashed lines are cpHMD and cMD simulation methods, respectively. “HIP<sup>cpHMD</sup><sub>pH12 δ</sub>” and “HIP<sup>cpHMD</sup><sub>pH12 ε</sub>” are the energy distributions calculated using partial charges fixed on the δ and ε protonation state.

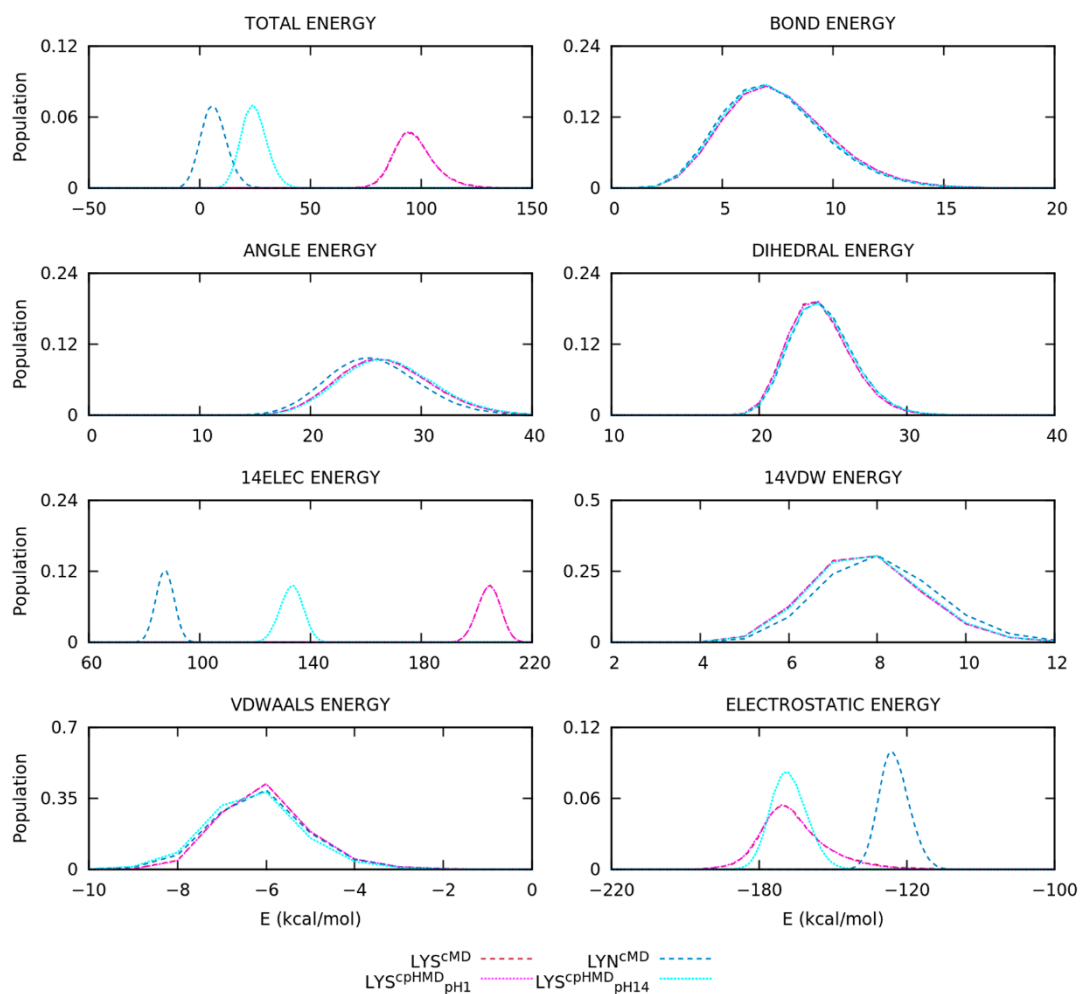

**Figure S18.** Energy distributions of the capped Lys<sub>2</sub> tripeptide without solvent molecules. Dotted and dashed lines are cpHMD and cMD simulations, respectively.

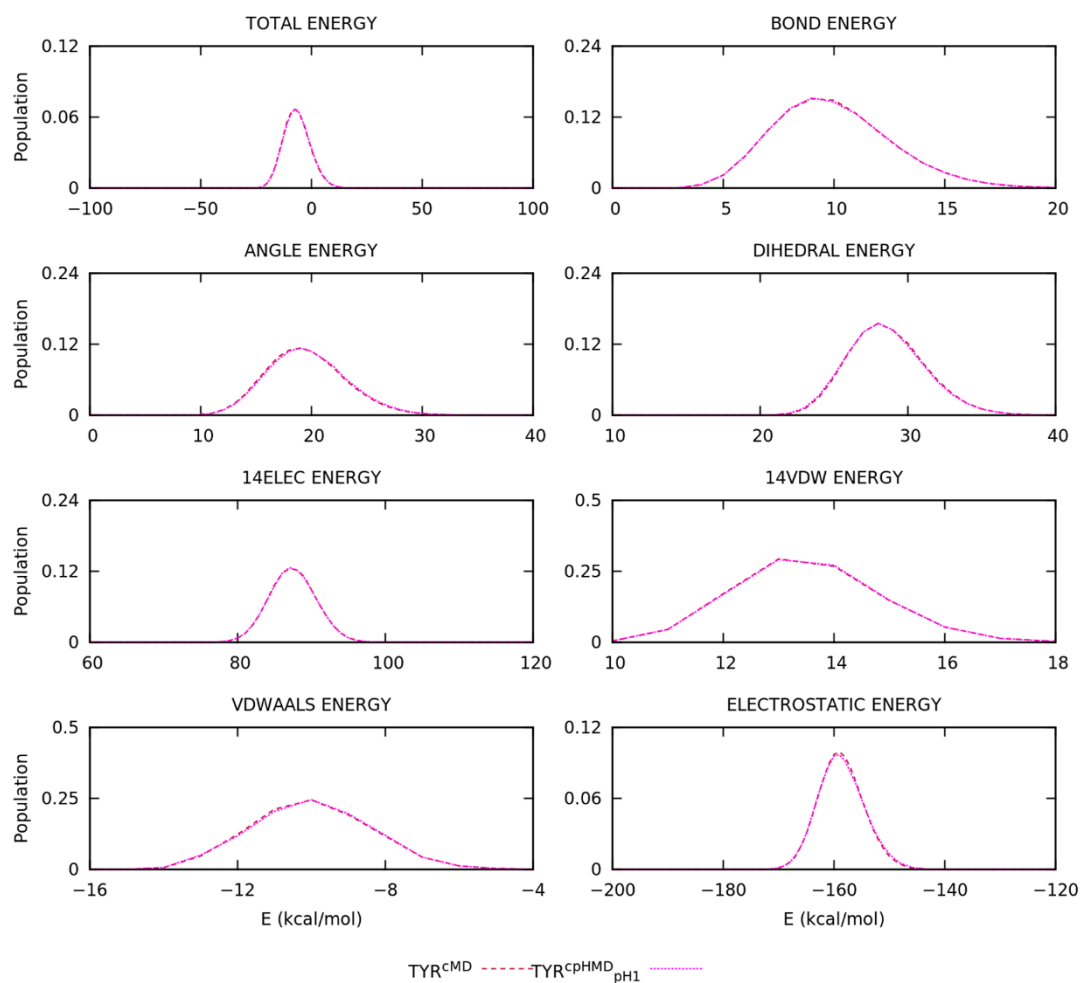

**Figure S19.** Energy distributions of the capped Tyr<sub>2</sub> tripeptide without solvent molecules. Dotted and dashed lines are cpHMD and cMD simulations, respectively.

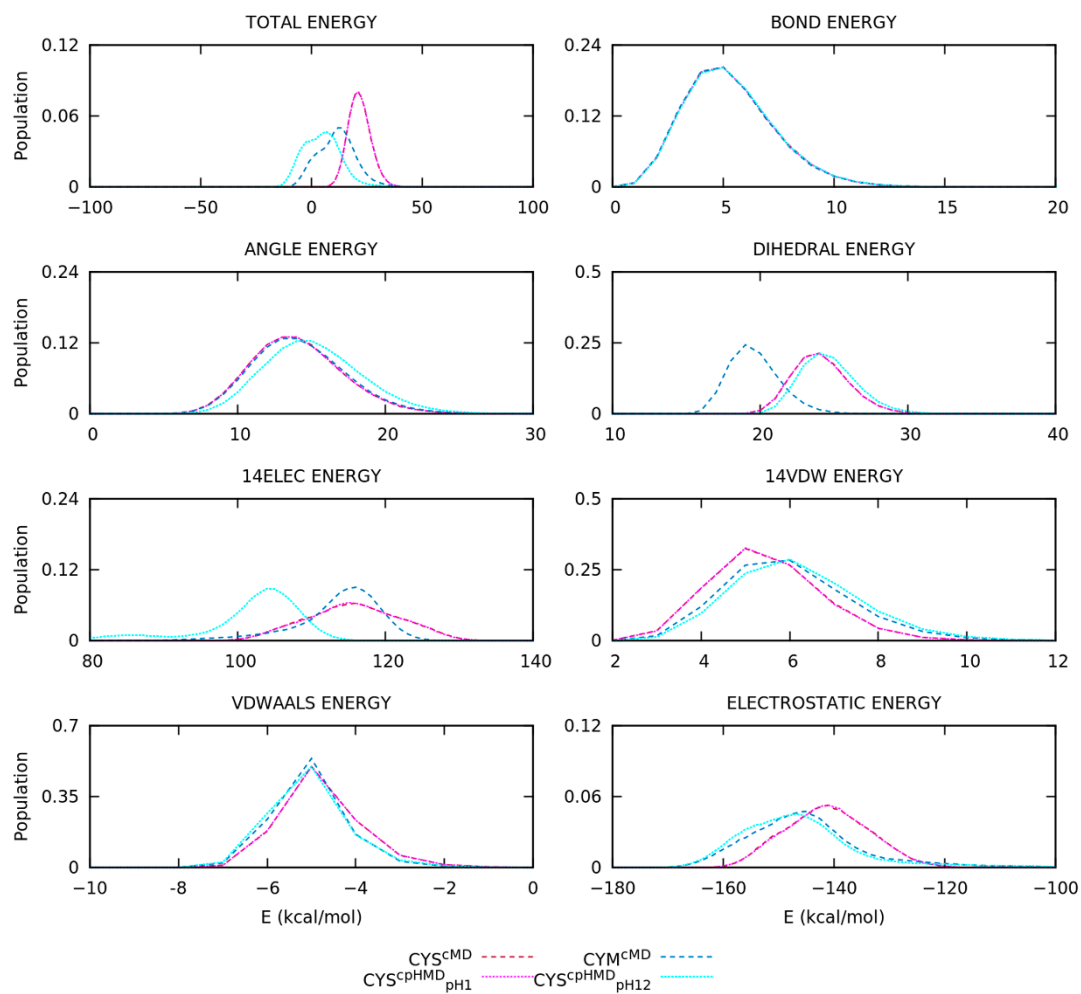

**Figure S20.** Energy distributions of the capped Cys<sub>2</sub> tripeptide without solvent molecules. Dotted and dashed lines are cpHMD and cMD simulations, respectively.

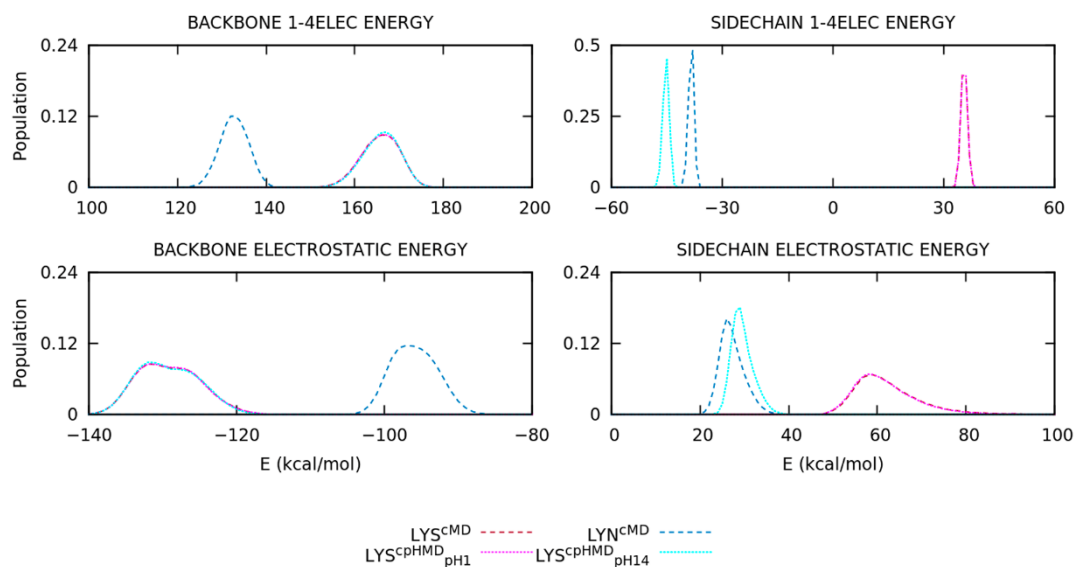

**Figure S21.** Energy distribution of the 1-4 and long-range electrostatics capped Lys<sub>2</sub> tripeptide divided in backbone and side chain atoms. Dotted and dashed lines are cpHMD and cMD simulation methods, respectively.

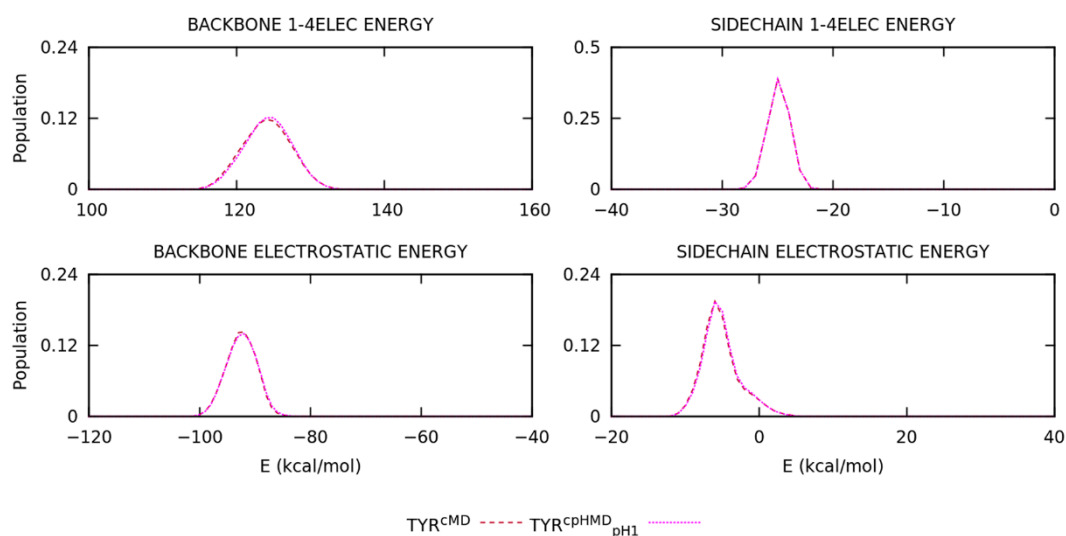

**Figure S22.** Energy distribution of the 1-4 and long-range electrostatics capped Tyr<sub>2</sub> tripeptide divided in backbone and side chain atoms. Dotted and dashed lines are cpHMD and cMD simulation methods, respectively.



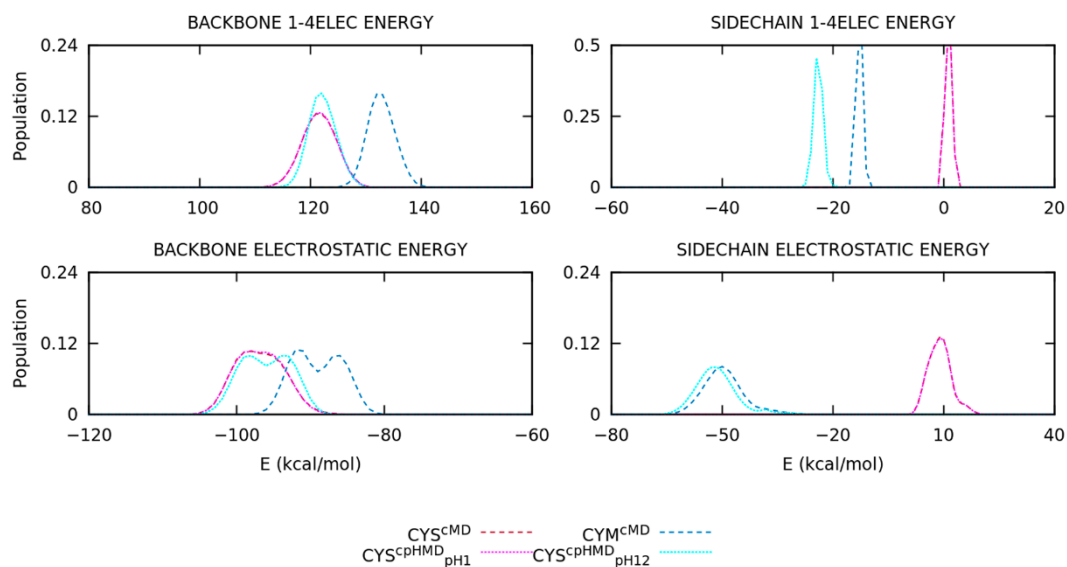

**Figure S23.** Energy distribution of the 1-4 and long-range electrostatics capped Cys2 tripeptide divided in backbone and side chain atoms. Dotted and dashed lines are cpHMD and cMD simulation methods, respectively.

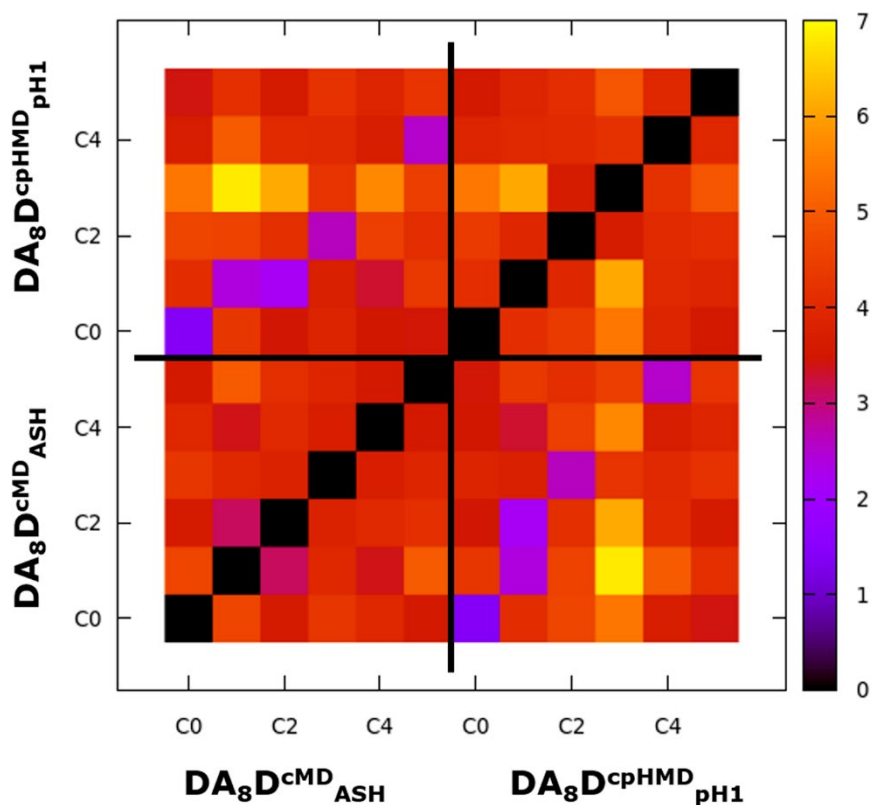

**Figure S24.** 2D-RMSD of the six first representative conformations of DA<sub>8</sub>D peptide in protonated form (DA<sub>8</sub>D<sup>cMD</sup><sub>ASH</sub> and DA<sub>8</sub>D<sup>cpHMD</sup><sub>pH1</sub>). RMSD is calculated using the C<sub>α</sub> atoms of the peptides.

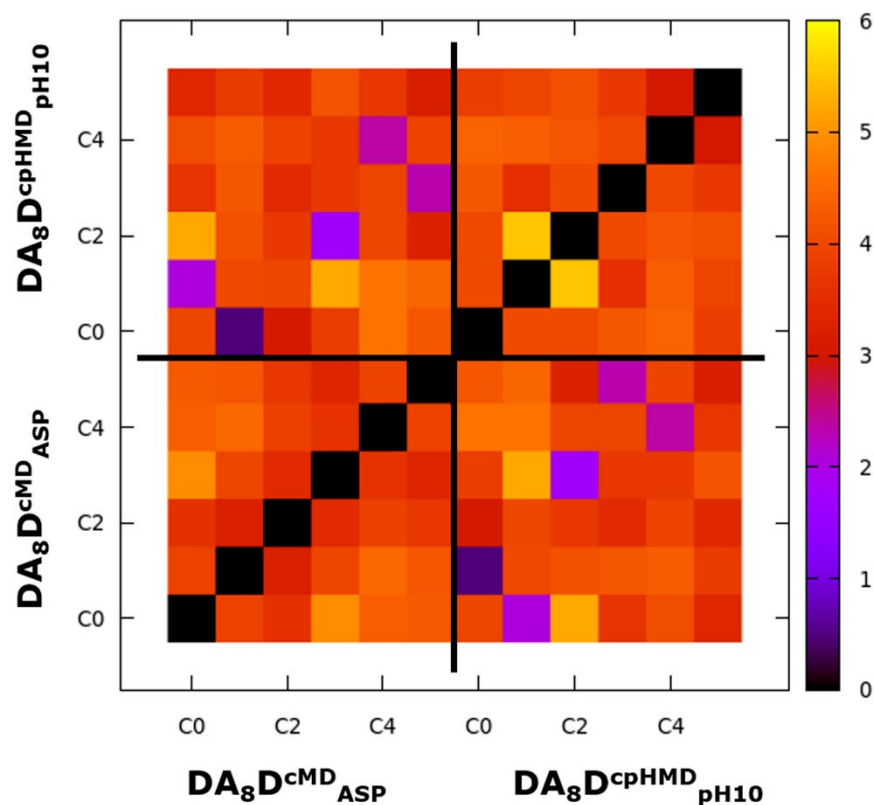

**Figure S25.** 2D-RMSD of the six first representative conformations of DA<sub>8</sub>D peptide in the deprotonated form (DA<sub>8</sub>D<sup>cMD</sup><sub>ASP</sub> and DA<sub>8</sub>D<sup>cpHMD</sup><sub>pH10</sub>). RMSD is calculated using the C<sub>α</sub> atoms of the peptides.

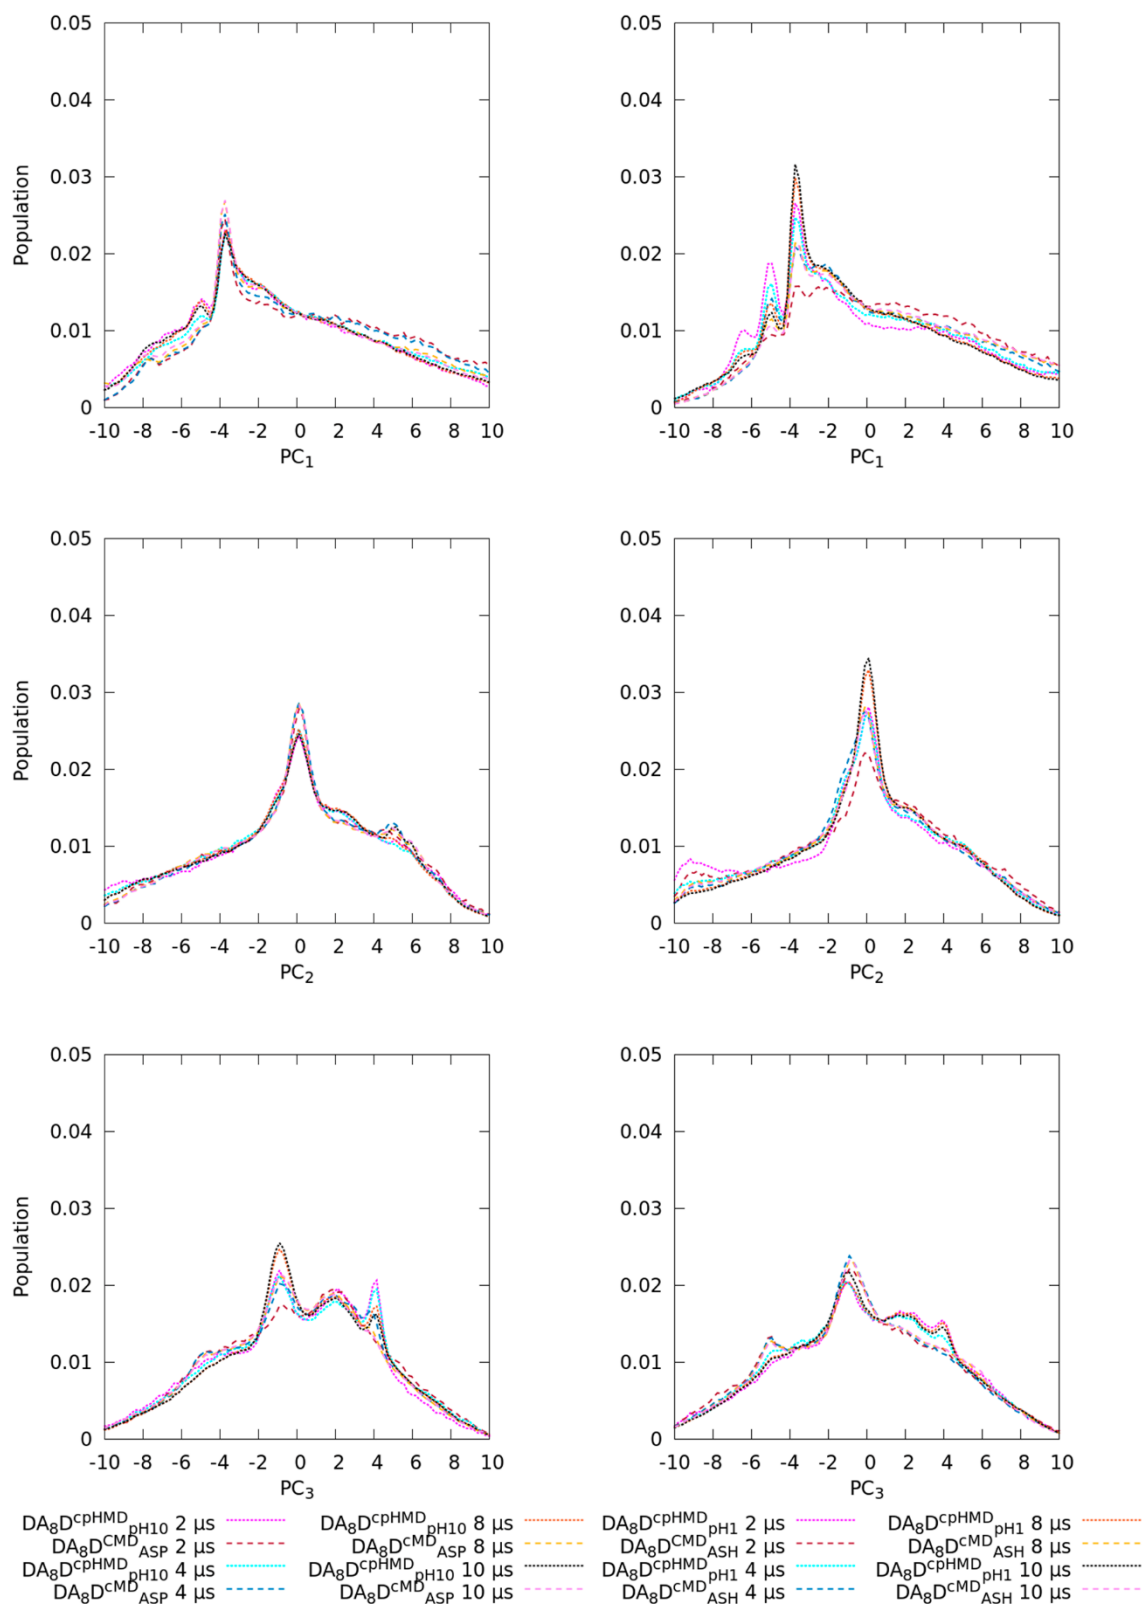

**Figure S26.** Distribution of the three first PC at several simulation times (2, 4, 8 and 10  $\mu$ s) of the DA<sub>8</sub>D peptide. Deprotonated and protonated form are in the left and right, respectively. Dotted and dashed lines are cpHMD and cMD simulation methods, respectively.

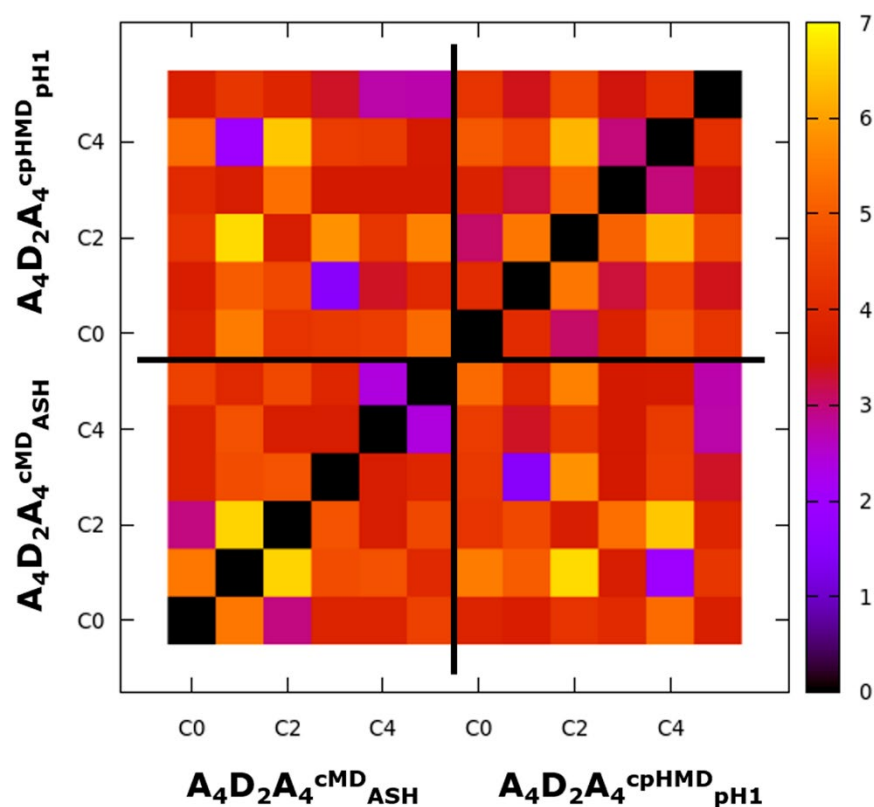

**Figure S27.** 2D-RMSD of the six first representative conformations of A<sub>4</sub>D<sub>2</sub>A<sub>4</sub> peptide in protonated form (A<sub>4</sub>D<sub>2</sub>A<sub>4</sub><sup>cMD</sup><sub>ASH</sub> and A<sub>4</sub>D<sub>2</sub>A<sub>4</sub><sup>cpHMD</sup><sub>pH1</sub>). RMSD is calculated using the C<sub>α</sub> atoms of the peptides.

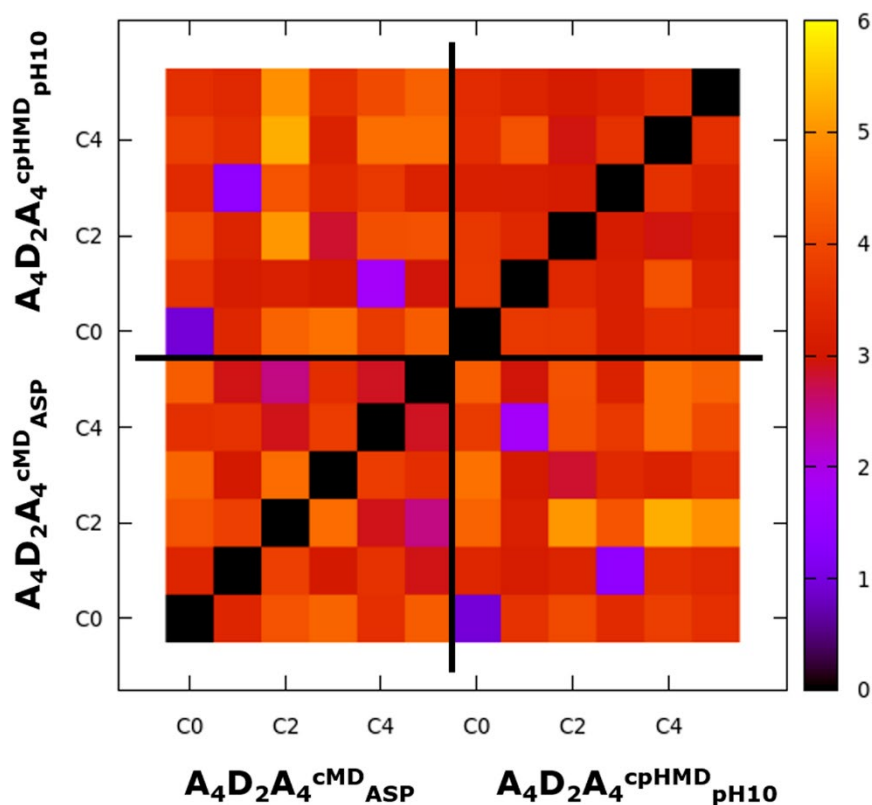

**Figure S28.** 2D-RMSD of the six first representative conformations of A<sub>4</sub>D<sub>2</sub>A<sub>4</sub> peptide in the deprotonated form (A<sub>4</sub>D<sub>2</sub>A<sub>4</sub><sup>cMD</sup><sub>ASP</sub> and A<sub>4</sub>D<sub>2</sub>A<sub>4</sub><sup>cpHMD</sup><sub>pH10</sub>). RMSD is calculated using the C<sub>α</sub> atoms of the peptides.

## REFERENCES

1. Rubio-Martinez, J.; Tomas, M.S.; Perez, J.J. Effect of the solvent on the conformational behavior of the alanine dipeptide deduced from MD simulations. *J. Mol. Graph. Model.* **2017**, *78*, 118–128, doi:10.1016/j.jmgm.2017.10.005.
